# Supplementary material for: Pro-inflammatory effects of human apatite crystals extracted from patients suffering from calcific tendinopathy
Source: Springer Nature journal article supplement (doi:10.1186/s13075-021-02516-9), 2021-04-29
Supplement: 13075_2021_2516_MOESM1_ESM.pdf [file 13075_2021_2516_MOESM1_ESM.pdf]

**Supplementary figure S1.** IL-1 $\beta$  release after 6h stimulation of CD14+ monocytes, MCSF-Macrophages, GM-CSF/IFN $\gamma$ -Macrophages by crystals at 250, 500 and 1000 ng/ml in presence of LPS (lipopolysaccharide) and parallel cell death rate. sHA= synthetic hydroxyapatite, CAL = human calcification CT= control group without crystal; LPS= lipopolysaccharide. n=3. \* p $\leq$  0,05

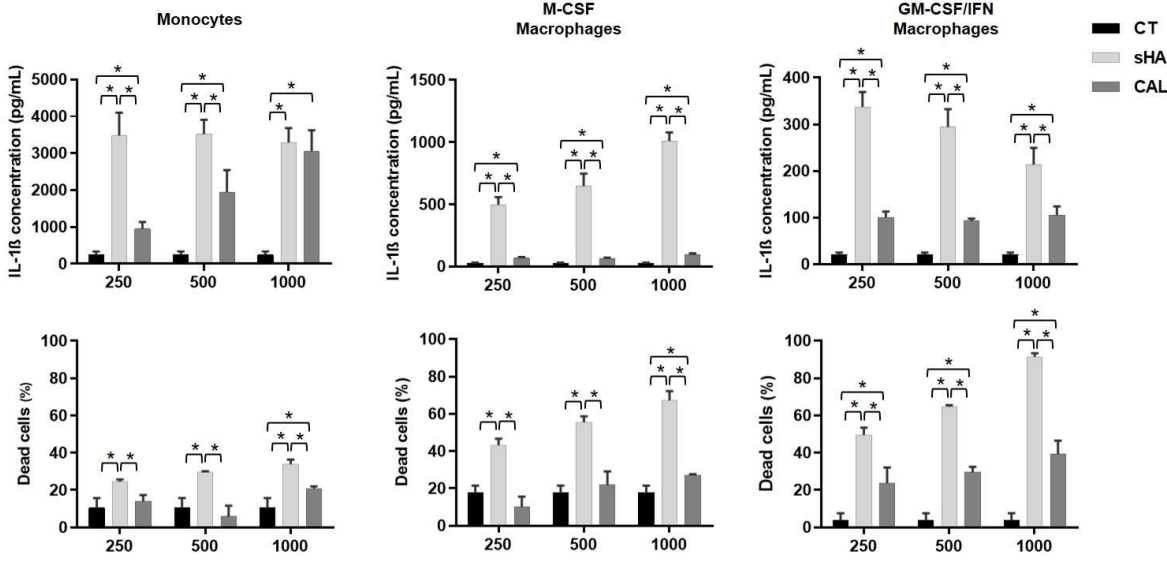

**Supplementary figure S2.** Western Blot raw images of sHA (positive control) and three patients. Cleaved IL-1 $\beta$  was studied in cellular lysates (CL) and in supernatants (SN). iNF- $\kappa$ B= NF- $\kappa$ B inhibitor; iCasp1= caspase-1 inhibitor; inh= inhibitor; sHA= synthetic hydroxyapatite; CAL= human calcification; CT = control condition without crystals.

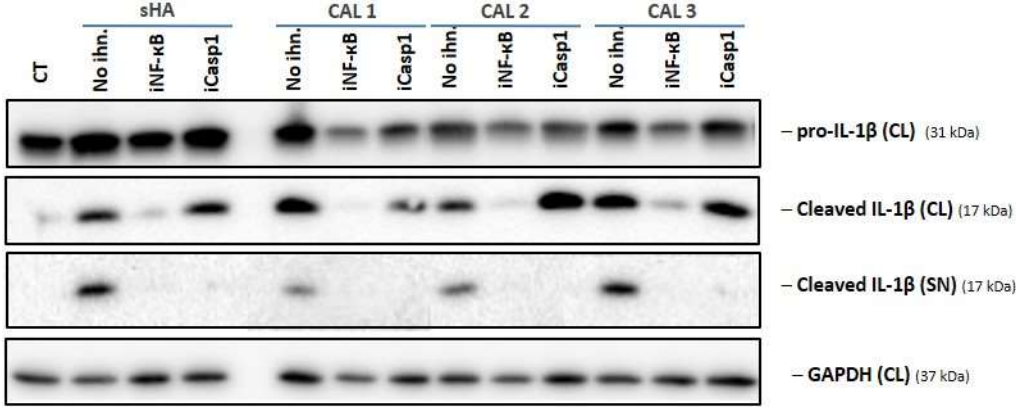

Supplementary table 1. Primers used for quantitative Polymerase Chain Reaction.

| <b>Gene name</b>                                     | <b>Forward</b>           | <b>Reverse</b>                |
|------------------------------------------------------|--------------------------|-------------------------------|
| <b><i>Human Interleukin-1<math>\beta</math></i></b>  | CCGGGACTCACAGCAAAA       | GGACATGGAGAACACCACTTG         |
| <b><i>Human IL-1 receptor antagonist</i></b>         | TGGGATGTTAACCAGAAGAC     | TCTCATCACCAGACTTGACA          |
| <b><i>Human Interleukin-6</i></b>                    | TCCACAAGCGCCTTCGGTCCAG   | CTCAGGGCTGAGATGCCGTCG         |
| <b><i>Human Interleukin-18</i></b>                   | GACCAAGGAAATCGGCCTCTA    | ACCTCTAGGCTGGCTATCTTTATACATAC |
| <b><i>Human NF<math>\kappa</math>B</i></b>           | ATAATGCCTTCCGGCTGAGT     | CCTCCACCAGCTCTCTGACT          |
| <b><i>Human TGF<math>\beta</math></i></b>            | GAGCCCAAGGGCTACCAT       | GGTTATGCTGGTTGTACAGG          |
| <b><i>Human TNF<math>\alpha</math></i></b>           | CAGCCTCTTCTCCTTCCTGAT    | GCCAGAGGGCTGATTAGAGA          |
| <b><i>Human HPRT</i></b>                             | TGACCTTGATTTATTTTGCATACC | CGAGCAAGACGTTTCAGTCCT         |
| <b><i>Murine Interleukin-1<math>\beta</math></i></b> | TACCTGTGGCCTTGGGCCTCAA   | GCTTGGGATCCACACTCTCCAGCT      |
| <b><i>Murine Interleukin-6</i></b>                   | TAGTCCTTCTACCCCAATTTCC   | TTGGTCCTTAGCCACTCCTTC         |
| <b><i>Murine TNF<math>\alpha</math></i></b>          | GGGTGATCGGTCCCCAAAGGGA   | TGGTTTGCTACGACGTGGGCTAC       |
| <b><i>Murine HPRT</i></b>                            | TCCTCCTCAGACCGCTTTT      | CCTGGTTCATCATCGCTAATC         |
